# Supplementary material for: Diabetic hand: prevalence and incidence of diabetic hand problems using data from 1.1 million inhabitants in southern Sweden
Source: PubMed Central journal article supplement — BMJ Open Diabetes Res Care. 2022 Jan 19;10(1):e002614. doi: 10.1136/bmjdrc-2021-002614 (PMC8772403; doi:10.1136/bmjdrc-2021-002614), 2022-01-19
Supplement: bmjdrc-2021-002614supp001.pdf [file bmjdrc-2021-002614supp001.pdf]

## Supplementary figures s1 - s5

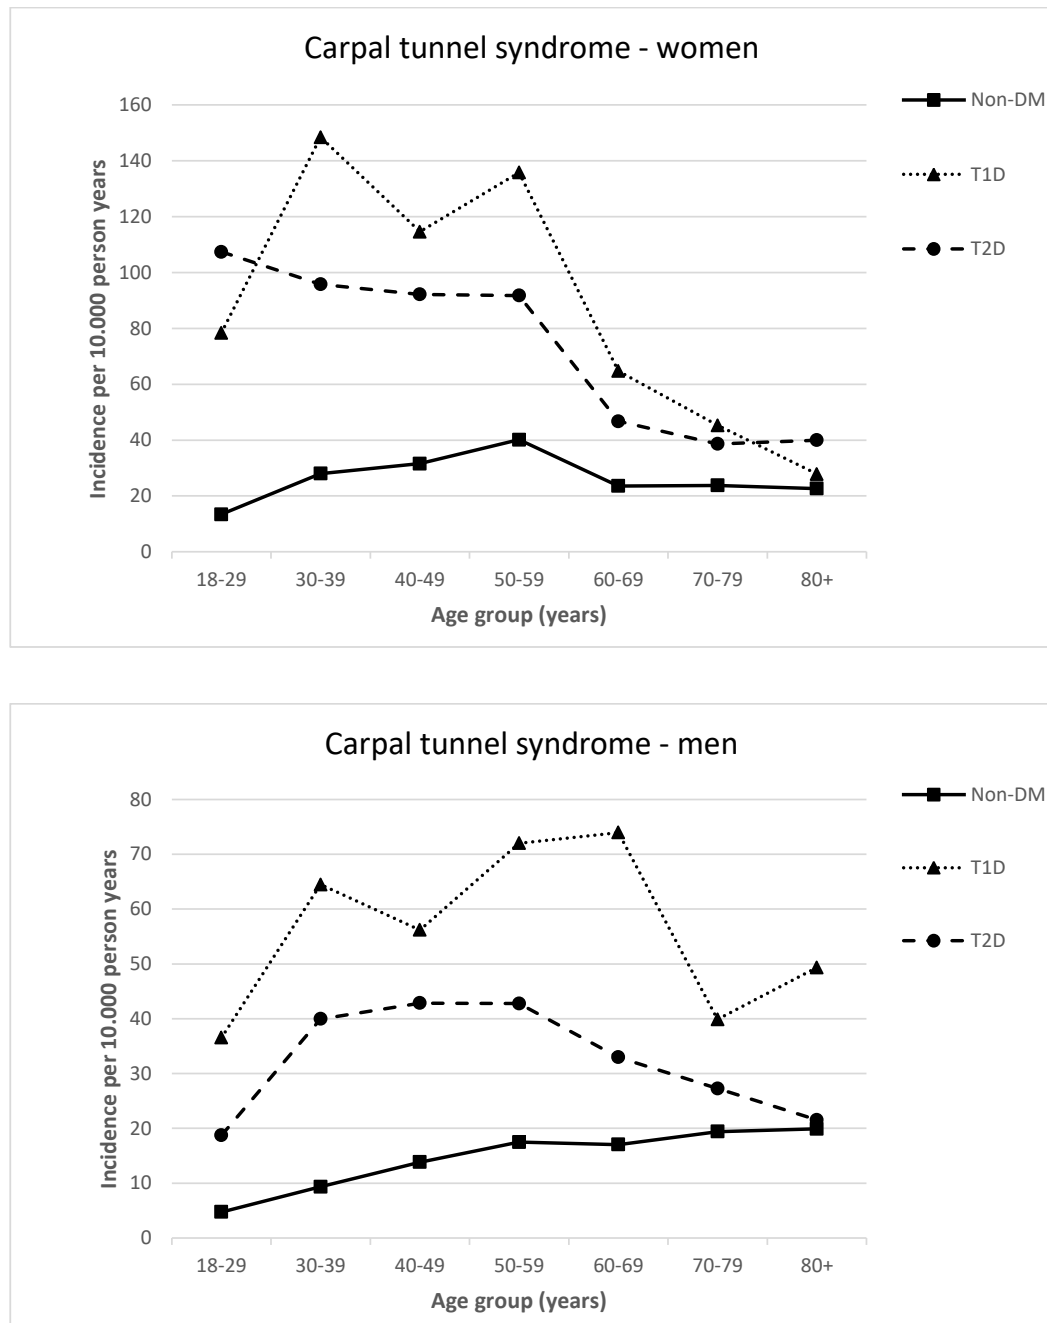

**Supplementary figure 1.** Age and sex stratified incidence rates of carpal tunnel syndrome between 2010 and 2019. Note different scales on the y-axis. For population demographics, see table 1. DM; diabetes mellitus, T1D; Type 1 diabetes, T2D, type 2 diabetes.

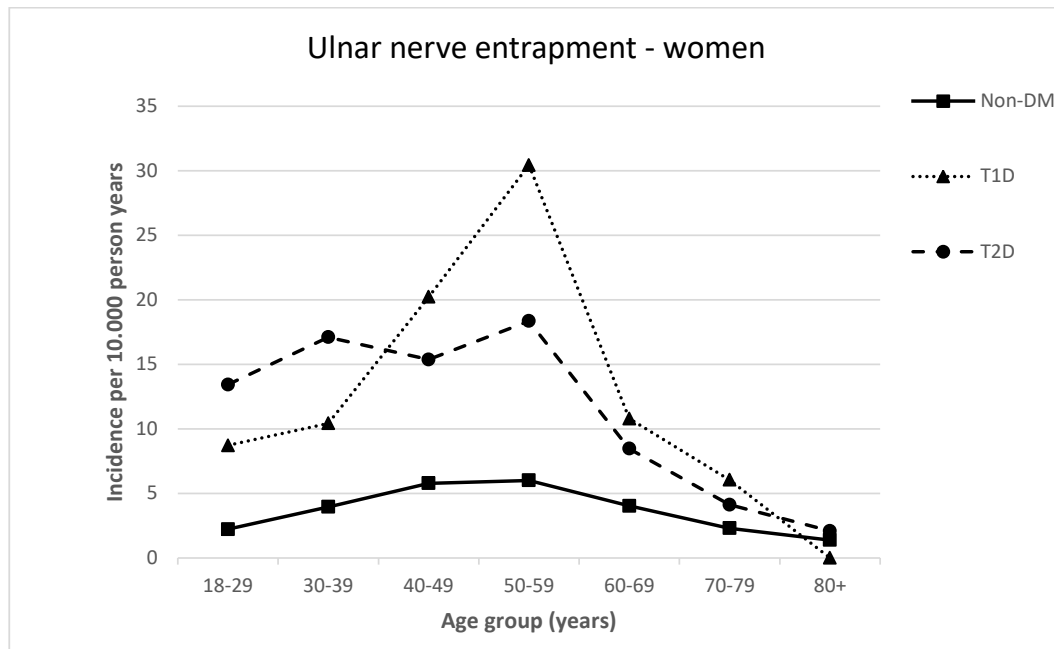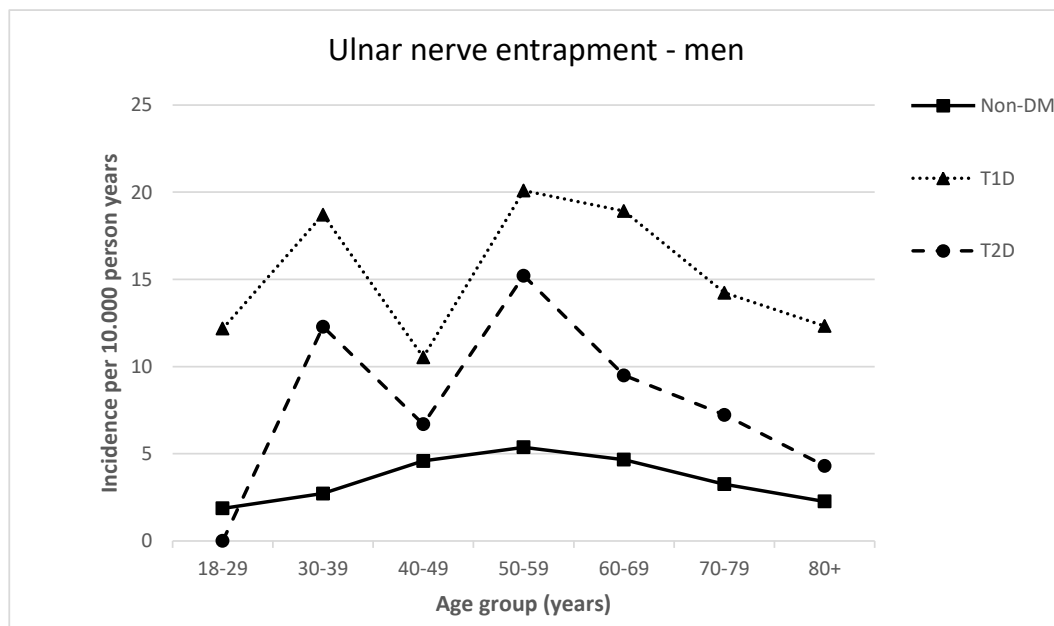

**Supplementary figure 2.** Age and sex stratified incidence rates of ulnar nerve entrapment between 2010 and 2019. For population demographics, see table 1. DM; diabetes mellitus, T1D; Type 1 diabetes, T2D, type 2 diabetes.

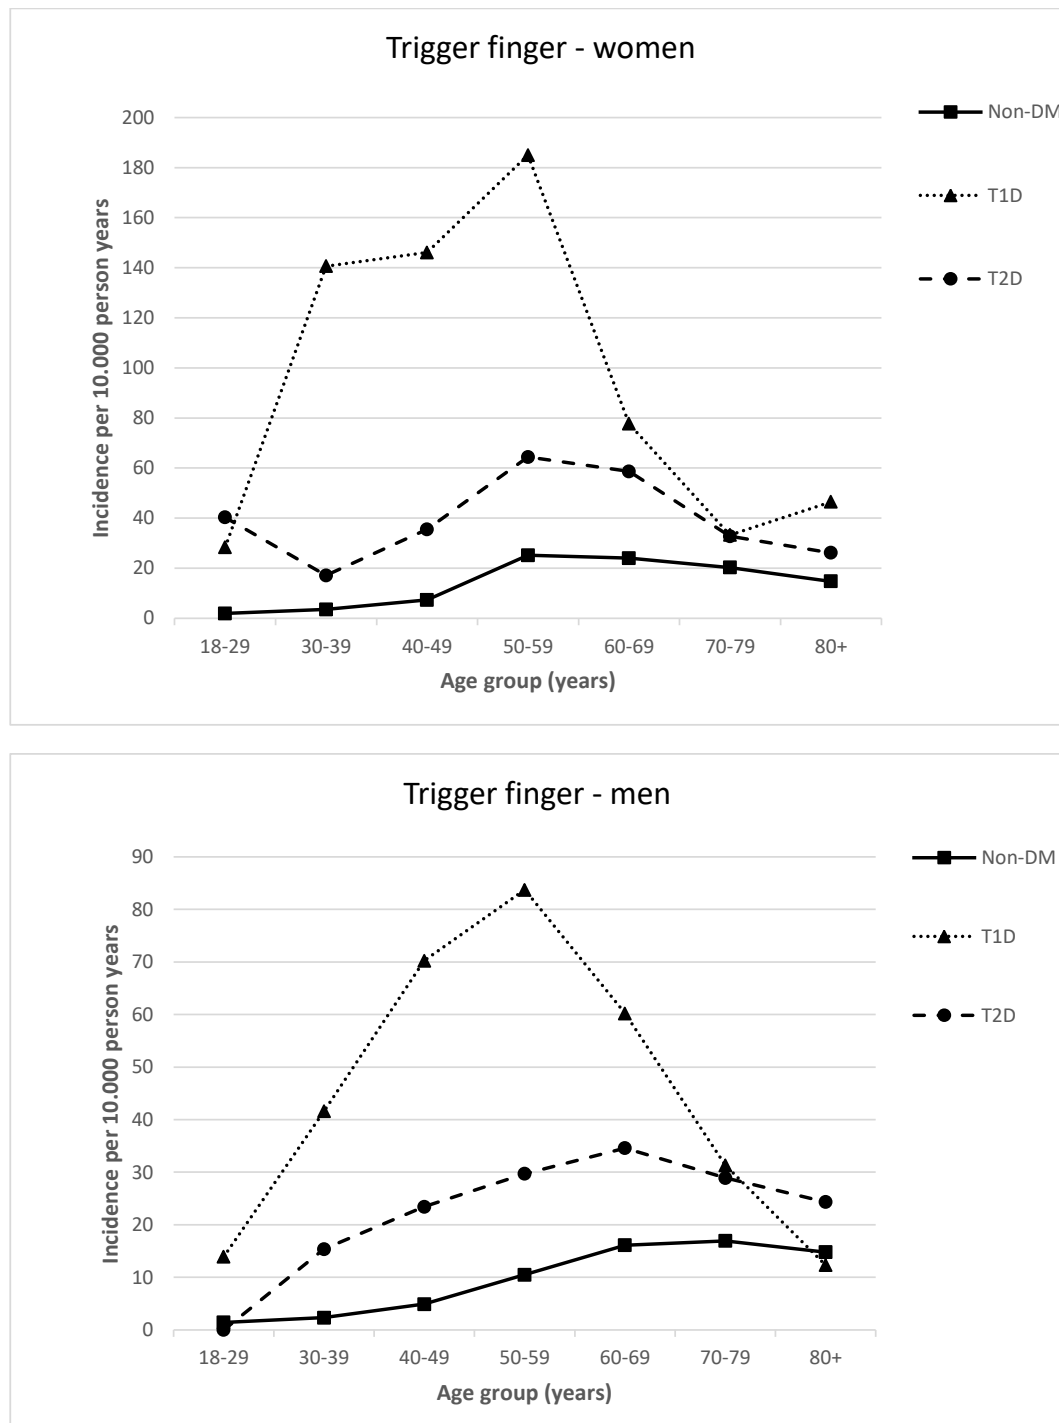

**Supplementary figure 3.** Age and sex stratified incidence rates of trigger finger between 2010 and 2019. Note different scales on the y-axis. For population demographics, see table 1. DM; diabetes mellitus, T1D; Type 1 diabetes, T2D, type 2 diabetes.

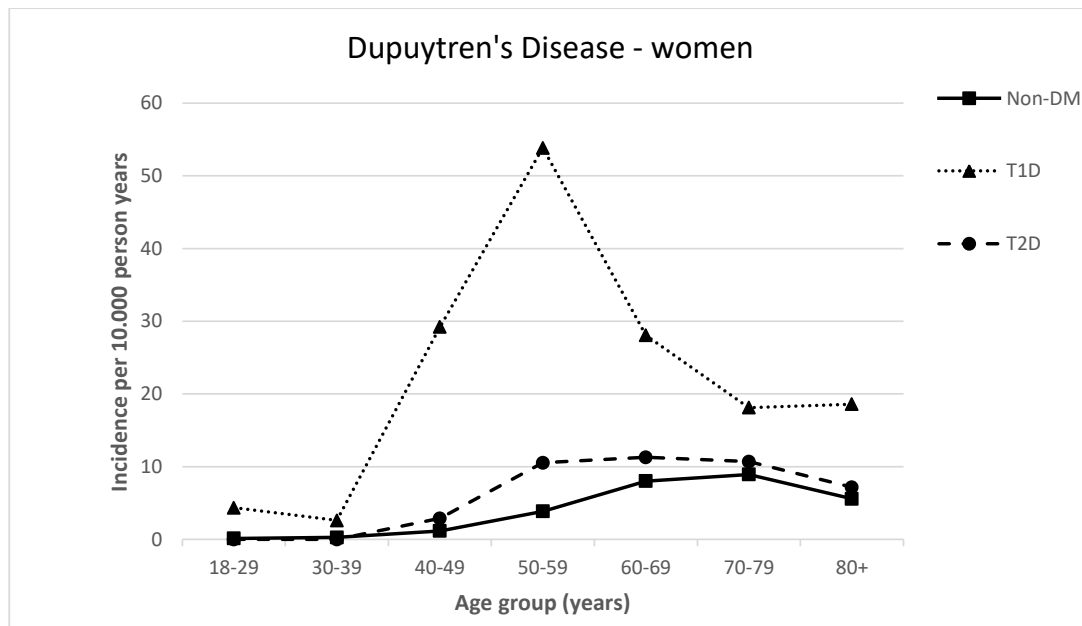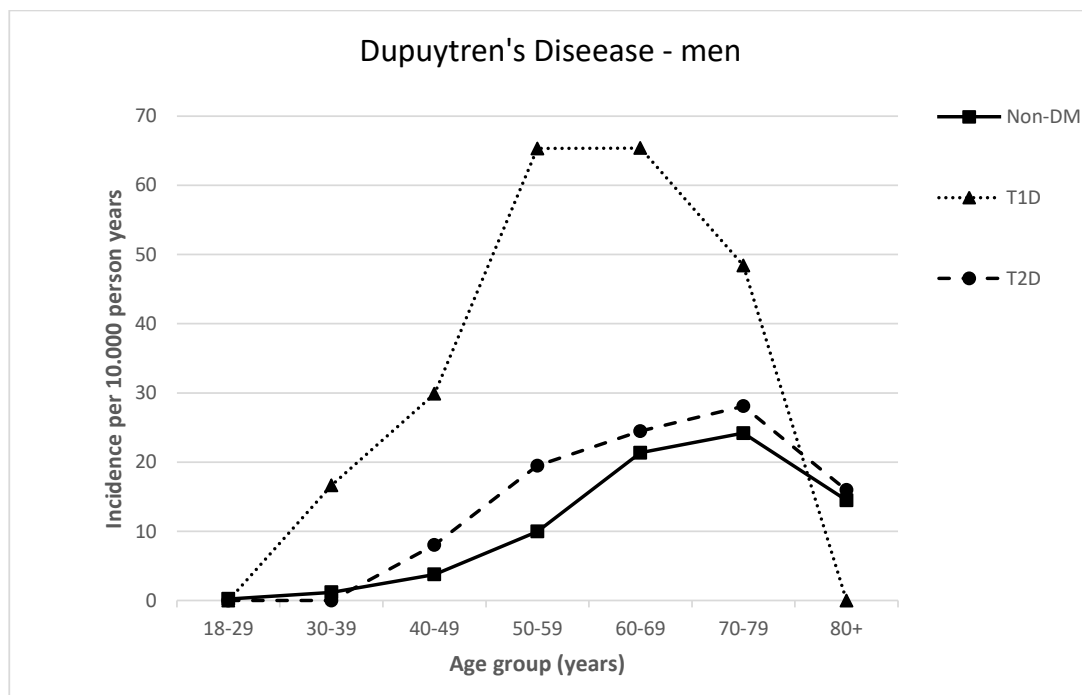

**Supplementary figure 4.** Age and sex stratified incidence rates of Dupuytren's disease between 2010 and 2019. For population demographics, see table 1. DM; diabetes mellitus, T1D; Type 1 diabetes, T2D, type 2 diabetes.

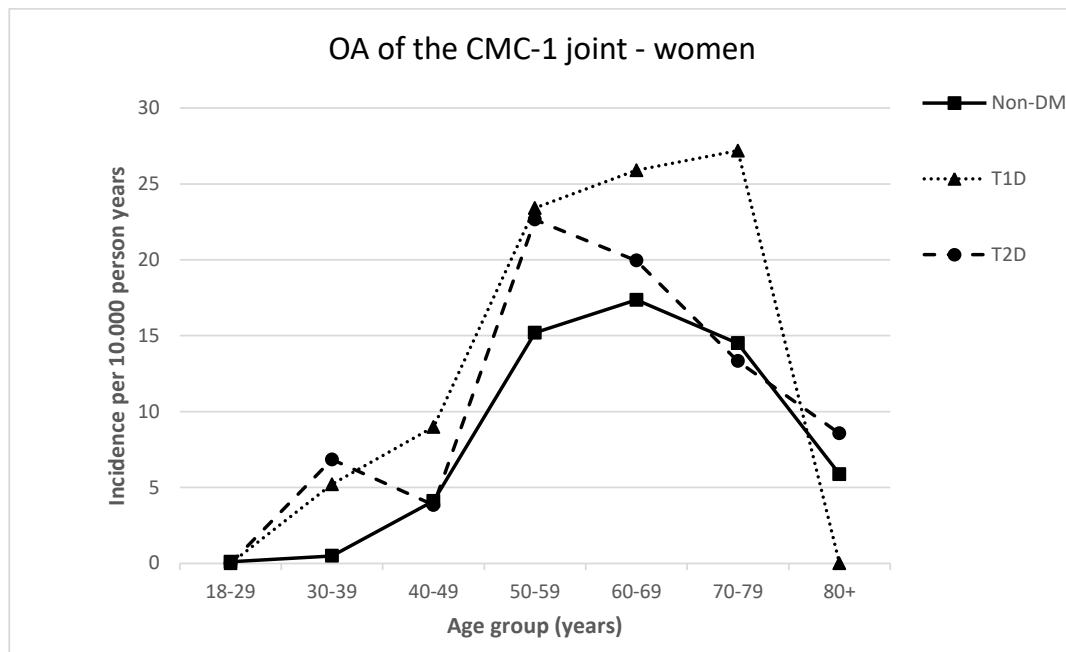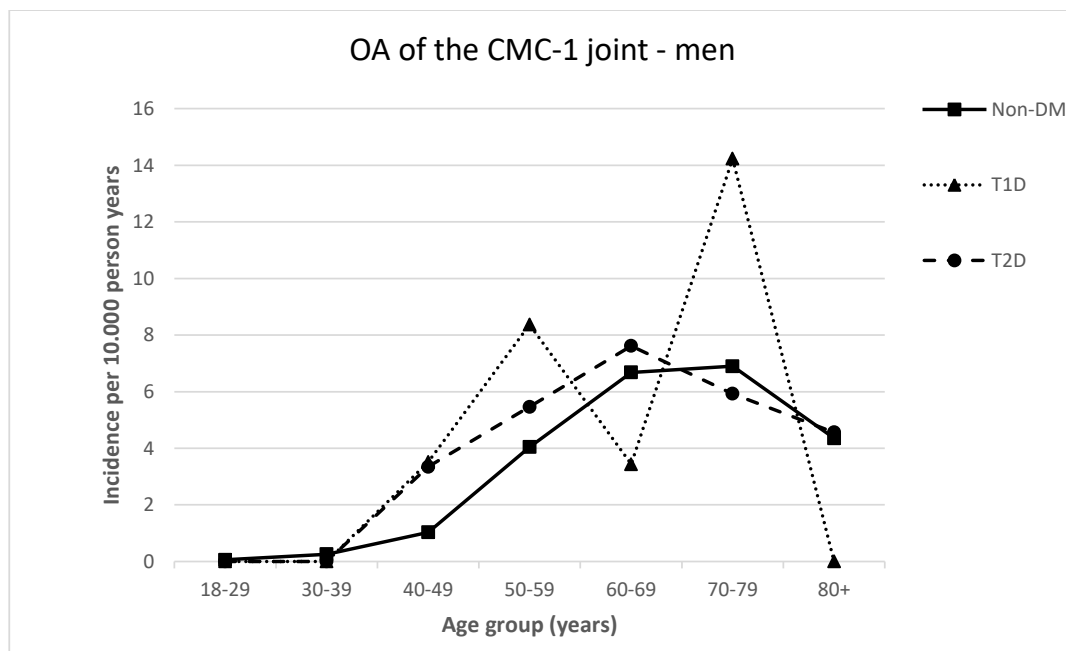

**Supplementary figure 5.** Age and sex stratified incidence rates of osteoarthritis of the CMC-1 joint between 2010 and 2019. Note different scales on the y-axis. For population demographics, see table 1. CMC-1; first carpometacarpal, DM; diabetes mellitus, OA; Osteoarthritis, T1D; Type 1 diabetes, T2D, type 2 diabetes.
